# Supplementary material for: A molecular electron density theory study of the bimolecular nucleophilic substitution reactions on monosubstituted methyl compounds
Source: Royal Society of Chemistry journal article supplement (doi:10.1039/d4ob01113a), 2024-01-01
Supplement: d4ob01113a1.pdf [file d4ob01113a1.pdf]

## Electronic Supporting Information (ESI)

# A Molecular Electron Density Theory Study of the Bimolecular Nucleophilic Substitution Reactions on Monosubstituted Methyl Compounds

Luis R. Domingo,<sup>1\*</sup> Patricia Pérez<sup>2</sup>, Mar Ríos-Gutiérrez,<sup>1</sup> and M. José Aurell<sup>1</sup>

<sup>1</sup> Department of Organic Chemistry, University of Valencia, Dr. Moliner 50, 46100 Burjassot, Valencia, Spain.

<sup>2</sup> Universidad Andrés Bello, Facultad de Ciencias Exactas, Departamento de Ciencias Químicas, Centro de Química Teórica & Computacional. Av. República 275, 8370146, Chile.

E-mail: luisrdomingo@gmail.com

### Index

- S2** Figure S1 with the representations of the contour line maps of the Laplacian  $\nabla^2\rho(\mathbf{r})$  of the electron density at the methyl **8** and tert-butyl **9** carbocations.
- S3** Figure S2 with the  $\omega$ B97X-D/6-311+G(d,p) geometries of the selected points of the scans for the C $\cdots$ OH<sub>2</sub> breaking bond in the reactions of protonated methanol **4** and tert-butanol **14**.
- S4** Table S1 with  $\omega$ B97X-D/6-311+G(d,p) total energies in DMSO of the stationary points involved in the S<sub>N</sub>2 reactions of methyl-substituted compounds **1** - **4**, and in the S<sub>N</sub>i reaction of **6**.
- S5**  $\omega$ B97XD/6-311+G(d,p) computed total energies, imaginary frequencies, and Cartesian coordinates, in DMSO, of the stationary points involved in the S<sub>N</sub>2 reactions of methyl-substituted compounds **1** - **4**, and in the S<sub>N</sub>i reaction of **6**.

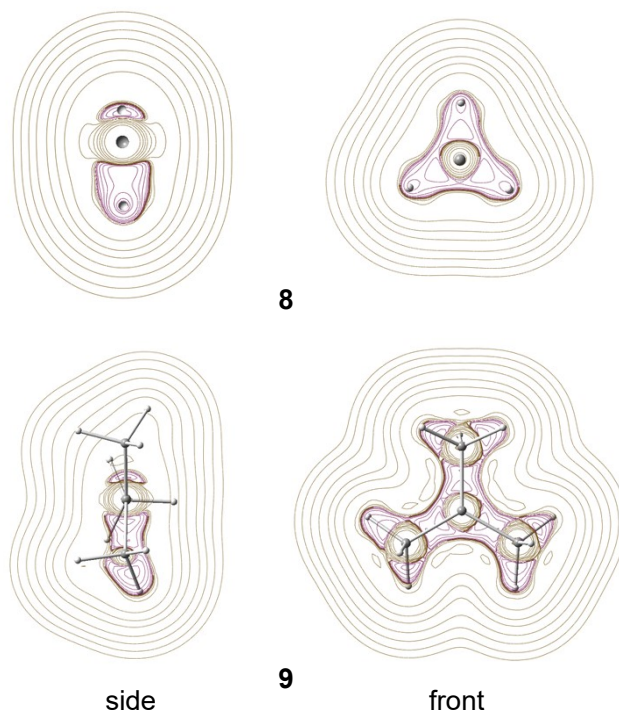

**Figure S1.** Representations of the contour line maps of the Laplacian  $\nabla^2\rho(\mathbf{r})$  of the electron density at the methyl **8** and tert-butyl **9** carbocations.

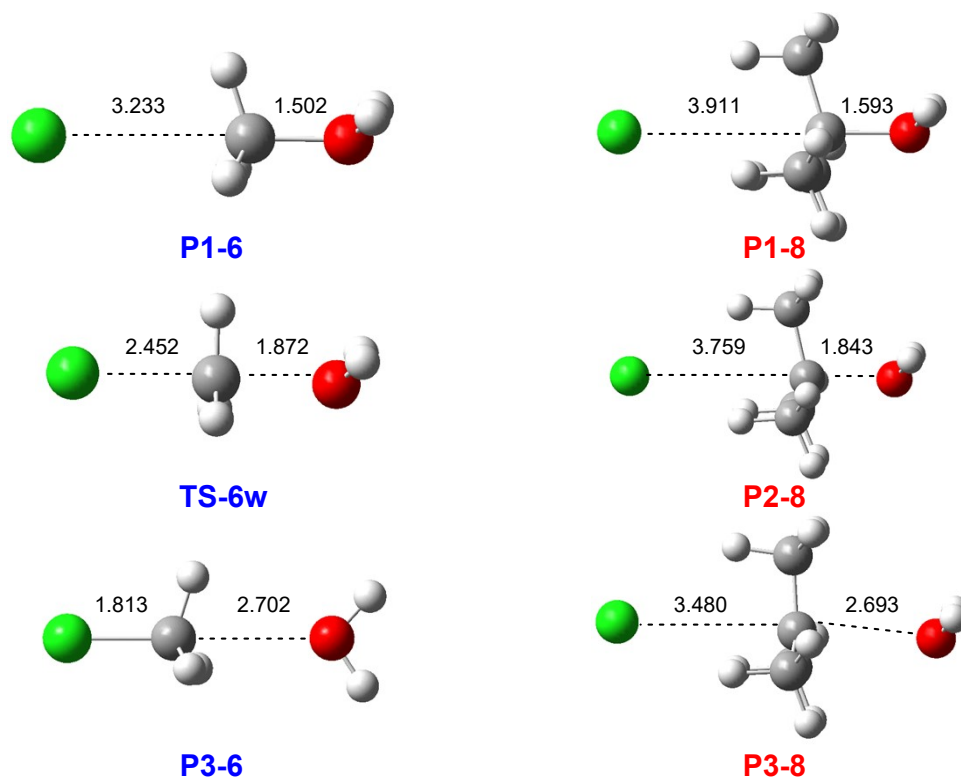

**Figure S2.**  $\omega$ B97X-D/6-311+G(d,p) Geometries of the selected points of the scans for the C...OH<sub>2</sub> breaking bond in the reactions of protonated methanol **4** and tert-butanol **14**.

**Table S1.**  $\omega$ B97X-D/6-311+G(d,p) total energies, in a.u., in DMSO of the stationary points involved in the  $S_N2$  reactions of methyl-substituted compounds **1** - **4**, and in the  $S_{Ni}$  reaction of **6**.

|                  | E           |
|------------------|-------------|
| <b>1</b>         | -139.749532 |
| <b>2</b>         | -500.120692 |
| <b>3</b>         | -2614.08799 |
| <b>4</b>         | -116.127247 |
| <b>5</b>         | -214.237571 |
| F <sup>-</sup>   | -99.9906947 |
| Cl <sup>-</sup>  | -460.393013 |
| Br <sup>-</sup>  | -2574.36375 |
| H <sub>2</sub> O | -76.4402341 |
| NMe <sub>3</sub> | -174.469667 |
| <b>TS-1</b>      | -239.707556 |
| <b>TS-2</b>      | -960.479763 |
| <b>TS-3</b>      | -3074.45014 |
| <b>TS-4</b>      | -600.090922 |
| <b>TS-5</b>      | -576.515477 |
| <b>TS-6</b>      | -674.573503 |
| <b>6</b>         | -791.329495 |
| <b>TS-7</b>      | -791.308569 |
| <b>7</b>         | -330.976745 |

$\omega$ B97XD/6-311+G(d,p) computed total energies, imaginary frequencies, and Cartesian coordinates, in DMSO, of the stationary points involved in the  $S_N2$  reactions of methyl-substituted compounds **1** - **4**, and in the  $S_Ni$  reaction of **6**.

**1**

E(RwB97XD) = -139.749531605 A.U.

|   |             |             |             |
|---|-------------|-------------|-------------|
| C | 0.00000000  | 0.00000000  | -0.64238500 |
| H | 0.00000000  | 1.03520900  | -0.98566200 |
| H | 0.89651700  | -0.51760400 | -0.98566200 |
| H | -0.89651700 | -0.51760400 | -0.98566200 |
| F | 0.00000000  | 0.00000000  | 0.75681100  |

**2**

E(RwB97XD) = -500.120692242 A.U.

|    |             |             |             |
|----|-------------|-------------|-------------|
| C  | 0.00000000  | 0.00000000  | -1.13867400 |
| H  | 0.00000000  | 1.03322900  | -1.47526600 |
| H  | 0.89480200  | -0.51661400 | -1.47526600 |
| H  | -0.89480200 | -0.51661400 | -1.47526600 |
| Cl | 0.00000000  | 0.00000000  | 0.66222600  |

**3**

E(RwB97XD) = -2614.08799470 A.U.

|    |             |             |             |
|----|-------------|-------------|-------------|
| C  | 0.00000000  | 0.00000000  | -1.52826200 |
| H  | 0.00000000  | 1.03449700  | -1.85842000 |
| H  | 0.89590000  | -0.51724800 | -1.85842000 |
| H  | -0.89590000 | -0.51724800 | -1.85842000 |
| Br | 0.00000000  | 0.00000000  | 0.42128100  |

**4**

E(RwB97XD) = -116.127247499 A.U.

|   |             |             |             |
|---|-------------|-------------|-------------|
| C | -0.78062100 | -0.00179500 | 0.00000000  |
| H | -1.09678500 | -0.50866300 | 0.90555900  |
| H | -1.06937900 | 1.04333300  | -0.00000100 |
| H | -1.09678600 | -0.50866500 | -0.90555800 |
| O | 0.69302600  | -0.00102500 | 0.00000000  |
| H | 1.19779200  | -0.82467600 | 0.00000000  |
| H | 1.20468100  | 0.81764100  | 0.00000000  |

**5**

E(RwB97XD) = -214.237559892 A.U.

|   |             |             |             |
|---|-------------|-------------|-------------|
| C | 0.35340100  | -0.67953800 | 0.26234000  |
| H | 0.05578800  | -0.10167200 | 1.13515400  |
| H | 1.04693000  | -0.10612900 | -0.34957900 |
| H | -0.52284700 | -0.95515300 | -0.32114700 |
| N | 1.03587900  | -1.92782900 | 0.72230500  |

|   |             |             |             |
|---|-------------|-------------|-------------|
| C | 2.24085900  | -1.56926100 | 1.53133400  |
| C | 1.45758200  | -2.73258000 | -0.46515100 |
| C | 0.09250300  | -2.72913200 | 1.56093700  |
| H | 1.95288300  | -3.63709500 | -0.11736600 |
| H | 0.57465300  | -2.98816600 | -1.04752300 |
| H | 2.14335500  | -2.13693000 | -1.06445900 |
| H | -0.20408100 | -2.13138300 | 2.42067300  |
| H | -0.77976700 | -2.98259900 | 0.96145500  |
| H | 0.59868400  | -3.63436300 | 1.89000100  |
| H | 1.92371600  | -0.98578800 | 2.39328900  |
| H | 2.72823300  | -2.48602400 | 1.85755600  |
| H | 2.91714100  | -0.98489800 | 0.91056800  |

**TS-1**

E(RwB97XD) = -239.707555983 A.U.

1 imaginary frequency -595.2075 cm<sup>\*\*</sup>-1

|   |             |             |             |
|---|-------------|-------------|-------------|
| C | 0.00006600  | 0.00004100  | 0.00081000  |
| H | 0.00002800  | -0.88502700 | -0.60873500 |
| H | 0.00005900  | -0.08540000 | 1.07211800  |
| H | -0.00003500 | 0.97055100  | -0.46075700 |
| F | -1.85059000 | -0.00002200 | -0.00041400 |
| F | 1.85054000  | -0.00001900 | -0.00041800 |

**TS-2**

E(RwB97XD) = -960.479763313 A.U.

1 imaginary frequency -567.8551 cm<sup>\*\*</sup>-1

|    |             |             |             |
|----|-------------|-------------|-------------|
| C  | -0.00010500 | -0.00003100 | 0.00108400  |
| H  | -0.00001400 | -0.92487500 | -0.54590600 |
| H  | -0.00000700 | 0.93622000  | -0.52615500 |
| H  | 0.00006200  | -0.01143300 | 1.07555300  |
| Cl | -2.34184300 | 0.00000800  | -0.00029300 |
| Cl | 2.34187800  | 0.00000800  | -0.00029500 |

**TS-3**

E(RwB97XD) = -3074.45013988 A.U.

1 imaginary frequency -538.8185 cm<sup>\*\*</sup>-1

|    |             |             |             |
|----|-------------|-------------|-------------|
| C  | 0.76749600  | -0.00012200 | -0.00078700 |
| H  | 0.76657500  | 0.19040800  | -1.05849600 |
| H  | 0.76663600  | 0.82063900  | 0.69298400  |
| H  | 0.76642700  | -1.01138600 | 0.36301100  |
| Br | -1.71230300 | 0.00001600  | 0.00010000  |
| Cl | 3.11917600  | 0.00003000  | 0.00021800  |

**TS-4**

E(RwB97XD) = -600.090921991 A.U.

1 imaginary frequency -594.2202 cm<sup>\*\*</sup>-1

|    |             |             |             |
|----|-------------|-------------|-------------|
| C  | -0.55198000 | -0.00037200 | 0.00029000  |
| H  | -0.61480400 | 0.87759800  | -0.61534200 |
| H  | -0.61499300 | -0.97277100 | -0.45181100 |
| H  | -0.61533500 | 0.09408200  | 1.06838300  |
| Cl | 1.65132200  | 0.00009000  | -0.00007500 |
| F  | -2.54616200 | 0.00019900  | -0.00018800 |

**TS-5**

E(RwB97XD) = -576.515490954 A.U.

1 imaginary frequency -504.4729 cm<sup>\*\*</sup>-1

|    |             |             |             |
|----|-------------|-------------|-------------|
| C  | -0.62710800 | 0.00000700  | -0.01440600 |
| H  | -0.54886300 | -0.92757000 | -0.55502100 |
| H  | -0.54886300 | 0.92796900  | -0.55436000 |
| H  | -0.55520200 | -0.00037100 | 1.05967500  |
| Cl | 1.82892300  | -0.00000200 | 0.00718300  |
| O  | -2.49391600 | -0.00000300 | -0.08750900 |
| H  | -2.86239900 | -0.77291000 | 0.35704600  |
| H  | -2.86239600 | 0.77290000  | 0.35705100  |

**TS-6**

E(RwB97XD) = -674.573503899 A.U.

1 imaginary frequency -583.8131 cm<sup>\*\*</sup>-1

|    |             |             |             |
|----|-------------|-------------|-------------|
| C  | 0.11548900  | -0.25091600 | 0.10139900  |
| H  | -0.01138300 | -0.00300900 | 1.14112900  |
| H  | 1.03492500  | 0.00019100  | -0.39895900 |
| H  | -0.59955800 | -0.89154000 | -0.38553000 |
| N  | 1.09566200  | -2.03648700 | 0.76296300  |
| Cl | -0.88894400 | 1.58105700  | -0.57723500 |
| C  | 2.26050500  | -1.62931000 | 1.54399900  |
| C  | 1.48485600  | -2.78453100 | -0.42940000 |
| C  | 0.13950300  | -2.78286700 | 1.57626800  |
| H  | 1.99662200  | -3.72005600 | -0.16698900 |
| H  | 0.59683500  | -3.02361500 | -1.01771300 |
| H  | 2.15614900  | -2.17705400 | -1.03945500 |
| H  | -0.17036200 | -2.17396000 | 2.42782400  |
| H  | -0.74150600 | -3.02285200 | 0.97788900  |
| H  | 0.57602900  | -3.71791600 | 1.95189800  |
| H  | 1.93782700  | -1.02878100 | 2.39670600  |
| H  | 2.81795400  | -2.49924400 | 1.91604500  |
| H  | 2.92536600  | -1.02659200 | 0.92231300  |

**6**

E(RwB97XD) = -791.329494675 A.U.

|    |             |             |             |
|----|-------------|-------------|-------------|
| N  | 2.43540700  | -0.56610200 | 0.29453300  |
| C  | -1.90480000 | -0.31598900 | -0.21887100 |
| Cl | -3.52830400 | -0.96982500 | 0.26821000  |
| C  | -1.83726100 | 1.18539600  | -0.01753700 |

|   |             |             |             |
|---|-------------|-------------|-------------|
| C | -0.50820400 | 1.79749600  | -0.47919200 |
| C | 0.73606600  | 1.27323900  | 0.25664300  |
| C | 1.43676600  | 0.14301800  | -0.49624900 |
| H | -2.65682600 | 1.65472800  | -0.56948500 |
| H | -0.38950300 | 1.64583000  | -1.55908900 |
| H | -0.58898600 | 2.87792100  | -0.33516400 |
| H | 1.43711300  | 2.09866100  | 0.40298500  |
| H | 0.45998900  | 0.91946200  | 1.25718900  |
| H | 0.69864000  | -0.59583900 | -0.82242200 |
| H | 1.88777400  | 0.55627900  | -1.42041500 |
| H | -1.99018300 | 1.41089400  | 1.04293800  |
| C | 2.92398000  | -1.72751300 | -0.43172100 |
| H | 3.43274200  | -1.45159700 | -1.37354600 |
| H | 3.63381400  | -2.28150200 | 0.18720000  |
| H | 2.09164300  | -2.39184100 | -0.67668000 |
| C | 3.54401000  | 0.29401100  | 0.67876600  |
| H | 4.27890700  | -0.28661400 | 1.24083200  |
| H | 4.05219400  | 0.73576500  | -0.19843900 |
| H | 3.19960100  | 1.10671100  | 1.32012000  |
| H | -1.18344100 | -0.85192800 | 0.39529500  |
| H | -1.77350000 | -0.59513900 | -1.26364800 |

**TS-7**

E(RwB97XD) = -791.308569135 A.U.

1 imaginary frequencies -518.7171 cm<sup>\*\*</sup>-1

|    |             |             |             |
|----|-------------|-------------|-------------|
| N  | 1.25839000  | -0.76104200 | 0.00673200  |
| C  | -0.92803000 | -0.26851300 | 0.09077400  |
| Cl | -3.17872400 | -0.39790900 | -0.11907900 |
| C  | -0.71710000 | 1.10604200  | 0.66922200  |
| C  | 0.12718400  | 2.02696900  | -0.21813600 |
| C  | 1.61871200  | 1.69615200  | -0.23858000 |
| C  | 1.92523800  | 0.29830300  | -0.76017800 |
| H  | -1.69365100 | 1.56325200  | 0.82573300  |
| H  | -0.85168100 | -0.42407100 | -0.97269700 |
| H  | -0.95844700 | -1.13800100 | 0.72494900  |
| H  | -0.27176300 | 2.00400400  | -1.23952900 |
| H  | 0.00242700  | 3.05220200  | 0.14005900  |
| H  | 2.13839700  | 2.40873100  | -0.88530200 |
| H  | 2.04045400  | 1.83406000  | 0.76236100  |
| H  | 1.56981100  | 0.21959900  | -1.79235400 |
| H  | 3.01176500  | 0.12296600  | -0.77675800 |
| H  | -0.26869600 | 1.00878200  | 1.66228000  |
| C  | 1.29761500  | -2.03196400 | -0.71015800 |
| H  | 2.32928600  | -2.38205900 | -0.85330900 |
| H  | 0.74871900  | -2.78887700 | -0.14595400 |
| H  | 0.82932800  | -1.92038000 | -1.69018400 |
| C  | 1.80519400  | -0.92110000 | 1.35102400  |
| H  | 1.23189700  | -1.68085200 | 1.88622800  |
| H  | 2.85833800  | -1.23442100 | 1.31784000  |



H 1.74052400 0.01147100 1.91004900

7

E(RwB97XD) = -330.976744724 A.U.

|   |             |             |             |
|---|-------------|-------------|-------------|
| C | 0.09314200  | 1.23704000  | -0.40806700 |
| C | -1.31724000 | 1.25548000  | 0.15817800  |
| C | -2.09109400 | 0.00000800  | -0.23874800 |
| C | -1.31725500 | -1.25547100 | 0.15818200  |
| C | 0.09310500  | -1.23702400 | -0.40811600 |
| H | -3.07562500 | 0.00002300  | 0.23202900  |
| H | -1.29558300 | 1.36947400  | 1.24544500  |
| H | -1.80326500 | 2.15084700  | -0.23509800 |
| H | 0.06397200  | 1.23611400  | -1.49941100 |
| H | 0.68072100  | 2.09410500  | -0.07826600 |
| H | -1.29555600 | -1.36943800 | 1.24545100  |
| H | -1.80330500 | -2.15084400 | -0.23504700 |
| H | 0.68069000  | -2.09412600 | -0.07842300 |
| H | 0.06386200  | -1.23601500 | -1.49945900 |
| H | -2.25051300 | -0.00000100 | -1.32283200 |
| C | 1.16683000  | -0.00003200 | 1.44932800  |
| H | 1.74310300  | -0.89259700 | 1.68521700  |
| H | 1.74356200  | 0.89225600  | 1.68514400  |
| H | 0.24308100  | 0.00023400  | 2.01887100  |
| C | 2.16905800  | 0.00000200  | -0.75505200 |
| H | 2.72893100  | 0.89221600  | -0.48096900 |
| H | 2.72893600  | -0.89222300 | -0.48101300 |
| H | 1.96735400  | 0.00003100  | -1.82429500 |
| N | 0.87148000  | -0.00001000 | -0.01593900 |
